# Supplementary material
Source: PubMed Central journal article supplement (PMC1458824)
Supplement: pnas_0600120103_1.pdf [file pnas_0600120103_1.pdf]

|                  |                                                                |     |
|------------------|----------------------------------------------------------------|-----|
| <b>At3g61130</b> | LDWRERLAMQSVRSLSFSKEILDVIATSTADLGPLSLDSFKKNNLSASWRGTGVDPSFRHS  | 120 |
| At2g46480        | -----MTDACCLKGNEDKMVPRFGHGTWIGKAFN--                           | 29  |
| At4g38270        | NIRLGRVKMGDLSPSWVLENPAYQVSRKTKGSQLVIPRDSFQNDTGMEDNASHSTTNQTD   | 116 |
| At5g47780        | LNLLPRE-----SPAVLRGGLVGAVYSDKNSRRLDQLSARVLSATD-                | 95  |
| At2g30575        | R-----LTAIEQDE-EGLKEPKRILQ-DRDFNSVVLSSNSD                      | 91  |
| At1g06780        | R-----LSAIEHEDGEGLKGPRLILFKDGEFNSSAES----                      | 88  |
| At2g38650        | SPGFVTVQPASSFESFTRINATKHTQRDVSERVDEVLQKINPVLPKKSDINVGSRD VNAT  | 108 |
| At3g25140        | -----MANHHRLLRGGGSPAI I-                                       | 17  |
| At3g02350        | -----MAVAFRGGRGVGVSGQS-                                        | 17  |
| At2g20810        | -----MRRRGGDSFRR-                                              | 11  |
| At1g18580        | -----MRRWPVDHRR-                                               | 10  |
| At5g54690        | -----                                                          |     |
| At3g01040        | -----                                                          |     |
| At5g15470        | -----MRSGRRPQGRRIAIRNETETELRSRIGESGSEKRNL                      | 37  |
| At3g58790        | -----                                                          |     |
| At1g19300        | -----                                                          |     |
| At3g50760        | -----                                                          |     |
| At1g13250        | -----                                                          |     |
| At3g06260        | -----                                                          |     |
| At1g02720        | -----                                                          |     |
| At4g02130        | -----                                                          |     |
| At3g62660        | -----                                                          |     |
| At1g24170        | -----                                                          |     |
| At1g70090        | -----                                                          |     |
| At3g28340        | -----                                                          |     |
| At1g54940        | TKTHNSRGKIFMIYLILVLSLLGLLIP-----FKP----                        | 33  |
| At1g08990        | -----                                                          |     |
| At4g33330        | MKMAPSKSALIRFNLVLLGFSFLLYTAI-----FFHPSSS                       | 42  |
| At1g77130        | SSPMESRHRLSFSNEKTSRRRFQRIEKG-----VKFNT                         | 37  |
| At3g18660        | TTGGDSRRRLSASIEAICKRRFRNRNSKGGGRSDMVKPFNIINFSTQDKNSSCCCF'TKFQI | 72  |
| At1g56600        | -----                                                          |     |
| At1g09350        | -----                                                          |     |
| At2g47180        | -----                                                          |     |
| At1g60450        | -----                                                          |     |
| At1g60470        | -----                                                          |     |
| At4g26250        | -----                                                          |     |
| At5g23790        | -----                                                          |     |

|                  |                                                               |     |
|------------------|---------------------------------------------------------------|-----|
| <b>At3g61130</b> | ENPATPDVKSNNLNEKRDSISKDSIHQKVETPTKIHRRLREKRREMRANELVQHNDTTI   | 180 |
| At2g46480        | -----DTPPEMLHERSLRQEKRLERANELMN--DDSL                         | 58  |
| At4g38270        | ES-----ENQFPNVDFASPAKLKRQILRQERRGQRTLELIRQEKETD               | 158 |
| At5g47780        | -----DDTHSHTDISIKQVTHDAASDSHINRENMHV                          | 126 |
| At2g30575        | KS-----NDTVQSNEGDQKNFLSEVDKGNNHKPKEE-QAVSQKTTVSSNAE           | 136 |
| At1g06780        | -----DGGNTYKNREEQVIVSQKMTVSSDEK                               | 114 |
| At2g38650        | SG-----TDSKKRGLPVSPTVVANPSPANKTKSEASYTG                       | 142 |
| At3g25140        | -----GGR---ITLTAFASTIALFLFTLSFFFASDS                          | 45  |
| At3g02350        | -----TGLRSFFSYRIFISALFSFLFLATFSVVLNS                          | 48  |
| At2g20810        | -----AGRRKISNVVWVLS--GIALLLFFLILSKA                           | 40  |
| At1g18580        | -----RGRRLSSWIWFLGFSFSVAGLVLFIVQHYH                           | 41  |
| At5g54690        | -----MQLHISPS-LRHVTVVT-----GKG                                | 19  |
| At3g01040        | -----                                                         |     |
| At5g15470        | IG-----SDVGMQLHISPS-MRSITISS-----SNE                          | 62  |
| At3g58790        | -----MKFYISATGIKKVTISNPGVGIGKGS                               | 27  |
| At1g19300        | -----                                                         |     |
| At3g50760        | -----                                                         |     |
| At1g13250        | -----                                                         |     |
| At3g06260        | -----                                                         |     |
| At1g02720        | -----                                                         |     |
| At4g02130        | -----                                                         |     |
| At3g62660        | -----                                                         |     |
| At1g24170        | -----                                                         |     |
| At1g70090        | -----                                                         |     |
| At3g28340        | -----                                                         |     |
| At1g54940        | -----LFRITSPSSTLRIDLPSQVKNKPKWLRLIRNYL                        | 67  |
| At1g08990        | -----                                                         |     |
| At4g33330        | VYFSSGASFVGCSEFRDCTPKVVRGVKMQELVEENEINKKDLLTASNQTKLEAPSFMEEIL | 102 |
| At1g77130        | LKLVLICIMLGALFTIYRFRYPPLQIPEIPTSFGLTTDPRYVATAEINWNHMSNLVEKHV  | 97  |
| At3g18660        | VKLLLFILLSATLFTIYS--PEAYHHSLSHSSSRQDPRYFSDLDINWDDVTKTLENIE    | 130 |
| At1g56600        | -----                                                         |     |
| At1g09350        | -----                                                         |     |
| At2g47180        | -----                                                         |     |
| At1g60450        | -----                                                         |     |
| At1g60470        | -----                                                         |     |
| At4g26250        | -----                                                         |     |
| At5g23790        | -----                                                         |     |



|                  |                                                               |     |
|------------------|---------------------------------------------------------------|-----|
| <b>At3g61130</b> | --LKNKNDLLQELQARLKDSQ-----RVLGEATSDADLPRSAHEKLRAMGQVLA        | 283 |
| At2g46480        | --FTNNLALHQEIEETQLMK-----LAWEEESTDIDQEQRVLDSIRDMGQILA         | 160 |
| At4g38270        | --SKNVTNLYVFLMQQCGENK-----RVIGKATSDADLPSSALDQAKAMGHALS        | 261 |
| At5g47780        | --AKANAHFVRELRLRIKEVQ-----RALADASKDSLDPKTAIEKLKAMEQTLA        | 226 |
| At2g30575        | --PGNNSQIVKELRVRTKELER-----ATGDTTKDKYLPKSSPNRLKAMEVALY        | 240 |
| At1g06780        | --PGSNSQVVKELRGRLKELER-----SVGDATKDKDLKSGALRRVKPMENVLY        | 218 |
| At2g38650        | --MPSQSKLTRDMKQNIQEFER-----ILSESSQDADLPPQVDKKLQKMEAVIA        | 246 |
| At3g25140        | LENSKLVRI FADLSRNYTDLINKPTYRALYSDGASIEESVLRQFEKEVKERIKMTRQVI  | 165 |
| At3g02350        | LDASKQLKLFEDLAINFSDLQSKPGLKSAVSDNGNALEEDSFRQLEKEVKDKVK'TARMMI | 168 |
| At2g20810        | --ESKNLQFAWDLSAQIRNSQ-----LLLSSAATRRSPLTVLESESTIRD---MAVLLY   | 143 |
| At1g18580        | --EHNHLHLAWELSSKIRSCQ-----LLLSKAAMRGQPISFDEAKPIITG---LSALIY   | 145 |
| At5g54690        | PKLLGRRVDSGNVPEAMY-----QVLEQPLSEQELKGRSDIPQTLQDFMS            | 124 |
| At3g01040        | PRLLGRIDDSEQRLVRDF-----YKILNEVSTQEIPDGLKLPESFSQLVS            | 100 |
| At5g15470        | PRLLGRVDDSE-RLARDF-----YKILNEVSTQEIPDGLKLPNSFSQLVS            | 162 |
| At3g58790        | R----GGDTSLKIGEELT-----RALVEETTDHQDVNGRGTGKSLESFDD            | 128 |
| At1g19300        | -----MSQHLLLLLILLSL                                           | 13  |
| At3g50760        | -----MHSKFILYLSI                                              | 11  |
| At1g13250        | -----MSS-----LRLRLCL                                          | 10  |
| At3g06260        | -----MASRSLSYTQLLGLLSFI                                       | 18  |
| At1g02720        | -----MHWITRFSAFFSAALAM                                        | 17  |
| At4g02130        | -----MLWITRFAGLFSAAAMAV                                       | 17  |
| At3g62660        | -----MRFSGLFSAAALVI                                           | 13  |
| At1g24170        | -----MSSRFSLTVVC                                              | 11  |
| At1g70090        | -----MRLRFPMKSAVLAFAIF                                        | 17  |
| At3g28340        | -----MMSGSRLASRLIIIFSI                                        | 17  |
| At1g54940        | ----EEASTCPEIPLPQPEGS DANVDVIVARVPCDGWSANKGLRDVFRQLQVNLAANLAV | 176 |
| At1g08990        | -----MEGSEADVDVVVKVPCDGFSEKRGLRDVFRQLQVNLAANLVV               | 43  |
| At4g33330        | EEEETEVPTCPEIPMPDFESLEK-LDLVVVKLPCN-YPEEGWRREVLRLQVNLAANLAA   | 211 |
| At1g77130        | EVEEFVPTCPSLPLIQ-IPGKPRIDLVI AKLPCD--KSGKWSRDVARLHLQLAAARVAA  | 209 |
| At3g18660        | EEQETEVVPCPNIPNIK-VPTR-RLDLIVVKLPCR--KEGNWSRDVGRHLHLQLAAATVAA | 242 |
| At1g56600        | -----                                                         |     |
| At1g09350        | -----                                                         |     |
| At2g47180        | -----                                                         |     |
| At1g60450        | -----                                                         |     |
| At1g60470        | -----                                                         |     |
| At4g26250        | -----                                                         |     |
| At5g23790        | -----                                                         |     |

|                  |                                                                |     |
|------------------|----------------------------------------------------------------|-----|
| <b>At3g61130</b> | KAKMQLYDCKLVTGKLRAMLQTADEQVRSLLKKQSTFLAQLAAKTIPNPIHCLSMRLTIDY  | 343 |
| At2g46480        | RAHEQLYECKLVTNKLRLAMLQTVDELENEQTYITFLTQLASKALPDAIHCLTMRLNLEY   | 220 |
| At4g38270        | LAKDELYDCHELAKKFRAILQSTERKVDGLKKKGTFLLIQLAAKTFPKPLHCLSLQLAADY  | 321 |
| At5g47780        | KGKQIQDDCSTVVKKLRAMLHSADEQLRVHKKQTMFLTQLTAKTIPKGLHCLPLRLTTDY   | 286 |
| At2g30575        | KVSRAFHNCPAIAATKLQAMTYKTEEQARAQKKQAAAYLMQLAARTTPKGLHCLSMRLTTEY | 300 |
| At1g06780        | KASRVFNCPAIAATKLRAMNYNTEEQVQAQKNQAAAYLMQLAARTTPKGLHCLSMRLTSEY  | 278 |
| At2g38650        | KAKSFPVDCNNVDKLLRQILDLTTEDEASFHMKQSVFLYQLAVQTMPKSLHCLSMRLTVEH  | 306 |
| At3g25140        | AEAKESFDNQLKIQKLLKDTIFAVNEQLTNAKKQGAFFSSLIAAKSIPKGLHCLAMRLMEER | 225 |
| At3g02350        | VESKESYDTQLKIQKLLKDTIFAVQEQLTKAKKNGAVASLISAKSVPKSLHCLAMRLVGER  | 228 |
| At2g20810        | QAQQLHYDSATMIMRLKASIQALEEQMSSVSEKSSKYGQIAAEEVPKSLYCLGVRLTTEW   | 203 |
| At1g18580        | KAQDAHYDIATMTMMTKSHIQALEERANAATVQTTIFGQLVAEALPKSLHCLTIKLTSDW   | 205 |
| At5g54690        | EVKRSKSDAREFAQKLEKEMVTLMEQRTRAKIQEYLVRHVASSSIPQLHCLLAKLANEH    | 184 |
| At3g01040        | DMKNNHYDAKTFALVFRAMVEKFERDLRESKFAELMKNKHFASSIPKGIHCLSLRLTDEY   | 160 |
| At5g15470        | DMKNNHYDAKTFALVLRAMMEKFERDMRESKFAELMKNKHFASSIPKGIHCLSLRLTDEY   | 222 |
| At3g58790        | LVKEMTLKRRDIRAFASVTKKMMERKQVSAKHHELVIWHLASHGIPKSLHCLSLRLTTEY   | 188 |
| At1g19300        | LLLHKPISATT-----IIQKFKEAPQFYNSADCLIDDSED                       | 50  |
| At3g50760        | LAVFTVSFAG-----GERFKEAPKFFNSPECLTIENDED-                       | 45  |
| At1g13250        | LLLLPITISCVTV-----TLTDLP-----AFREAPAFRNGRECSKTTWIPSD           | 52  |
| At3g06260        | LLLVTTTTMAVRVGVILHKPSAPTLP-----VFREAPAFRNGDQCG-----            | 59  |
| At1g02720        | ILLSPSLQSFSPAAAIRSSHPYADEFKPQQNS--DYSSFRESMPFRNAEQCRSSGEDSGV   | 75  |
| At4g02130        | IVLSPSLQSFPPAAAIRSSP--SPIFR-----KAPAVFNNGDECLSSG---GV          | 60  |
| At3g62660        | IVLSPSLQSFPPAAEAIRSSHLDAYLRFPSDPPPHRFVFRKAPVFRNAADCAAADIDSGV   | 73  |
| At1g24170        | LIALLLPFVVGIRLIPARITSVGDGGGGGGNNGFVKLGPFMFAPEYRNGKECVSSSVNREN  | 71  |
| At1g70090        | LVFIFLPSVVGIRMIIPGRLTAVSATVNG-----FDLGSFVEAPEYRNGKECVSQSLNREN  | 72  |
| At3g28340        | ISTSFFTVESIRLFPDSFDDASS-----DLMEAPAYQNLDCSLVLAKNRLL            | 63  |
| At1g54940        | QSGLRITVNVQAVYVVFIGSCGPMHEIFPCDERVMRVEDYVWYKPYLPRLKQKLLMPVGSQC | 236 |
| At1g08990        | ESGRNRVDRTVYVVFIGSCGPMHEIFRCDERVKRVGDYVWYRDPDLTRLKQKLLMPPGSCQ  | 103 |
| At4g33330        | KKGKTDWRWKSXVLFWSKCPMIEIFRCDDLEKREADWVLYRPEVVRLQQRSLPVGSCN     | 271 |
| At1g77130        | SS---KGLHNHVHILVSDCFPIPNLFTGQELVARQGNIWLYKPNLHQLRQKLQLPVGSCE   | 266 |
| At3g18660        | SA---KGFFRGHVFFVSRCFPIPNLFRCKDLVSRRGDVWLYKPNLDTLRDKLQLPVGSCE   | 299 |
| At1g56600        | -----MAPEINT--                                                 | 7   |
| At1g09350        | -----MAPEMNN--                                                 | 7   |
| At2g47180        | -----MAPGLTQTA                                                 | 9   |
| At1g60450        | -----MTPETHVD-                                                 | 8   |
| At1g60470        | -----MAPEISVN-                                                 | 8   |
| At4g26250        | -----MAQMSMTVEKS-                                              | 11  |
| At5g23790        | -----MTMTVEKR-                                                 | 8   |

|                  |                         |                                                         |                                      |                     |    |
|------------------|-------------------------|---------------------------------------------------------|--------------------------------------|---------------------|----|
| <b>At3g61130</b> | YLLSP----               | EKRKFPRSENLENPNLYHYALFSDNVLAASVVVNSTIMNAKDPSKHVFLV      | 399                                  |                     |    |
| At2g46480        | HLLPL----               | PMRNFPRRENLENPKLYHYALFSDNVLAASVVVNSTMNAQDPSRHVFLV       | 276                                  |                     |    |
| At4g38270        | FILGFNEEDAVKEDVSQKKLEDP | SLYHYAIFSDNVLATSVVVNSTVLNAKEPQRHVFFHIV                  | 381                                  |                     |    |
| At5g47780        | YALNS----               | SEQQFPNQEKLEDTQLYHYALFSDNVLATSVVVNSTITNAKHPLKHVFFHIV    | 342                                  |                     |    |
| At2g30575        | FSLDH----               | EKRQLL-QQSYNDPDLHYVVFSDNVLASSVVVNSTISSSKEPERIVFHV       | 355                                  |                     |    |
| At1g06780        | FSLDP----               | EKRQMPNQNYFDANFNHYVVFSDNVLASSVVVNSTISSSKEPERIVFHV       | 334                                  |                     |    |
| At2g38650        | FKSDS-----              | LEDPISEKFSDPSLLHFVVIISDNILASSVVINSTVHVHARDSKNFVFLV      | 360                                  |                     |    |
| At3g25140        | IAHP--                  | EKYTDEGKDRPRELEDPNLYHYAIFSDNVIAASVVVNSAVKNAKEPKHVFFHV   | 283                                  |                     |    |
| At3g02350        | ISNP--                  | EKYKDAPPDP--AAEDPTLYHYAIFSDNVIAVSVVVRVVMNAEEPWKHVFFHV   | 284                                  |                     |    |
| At2g20810        | FQNLDLQRTLKERSRVDSKLTDN | SLYHFCVFSDNIIATSVVVNSTALNSKAPEKVVFFHLV                  | 263                                  |                     |    |
| At1g18580        | VTEP--                  | SRHELADENRNSPRLVDNNL                                    | YHFCIFSDNVIAVSVVVNSTVSNADHPKQLVFFHIV | 264                 |    |
| At5g54690        | SINAAAR-LQLPEAELVPLVDN  | NNYFHFVFLASDNILAASVVAKSLVQNALRPHKIVLHII                 | 243                                  |                     |    |
| At3g01040        | SSNAHAR-RQLPSPPELLPVLS  | DNAYHHFVLATDNILAASVVVSSAVQSSSKPEKIVFFHVI                | 219                                  |                     |    |
| At5g15470        | SSNAHAR-RQLPSPPEFLPVLS  | DNAYHHFVLSTDNILAASVVVSSAVQSSSKPEKIVFFHII                | 281                                  |                     |    |
| At3g58790        | SVNAMAR-MRLPPPEVSRLTDP  | SFHHIVLLTDNVLAASVVISSTVQNAVNPKEFVFFHIV                  | 247                                  |                     |    |
| At1g19300        | DDVVAKP-----            | IFCSRAVHVAMTLDAAAYIRGSVAAVLSVLQHSSCPENIVFFHV            | 101                                  |                     |    |
| At3g50760        | -----                   | FVCSDKAIHVAMTLDTAYLRGSMAVILSVLQHSSCPQNIIVFFHV           | 89                                   |                     |    |
| At1g13250        | -----                   | HEHNPSIIHIAMTLDAIYLRGSVAGVFSVLQHASCPENIVFFHI            | 96                                   |                     |    |
| At3g06260        | -----                   | TREADQIHIAMTLDTNYLRGTMAAVLSLLQHSSTCPENLSFFHL            | 102                                  |                     |    |
| At1g02720        | CN-----                 | PNLVHVAITLTDIDYLRGSAAVNSILQHS MCPQSVFFHFL               | 117                                  |                     |    |
| At4g02130        | CN-----                 | PSLVHVAITLTDVEYLRGSAAVNSILQHSVCPEVFFHFI                 | 102                                  |                     |    |
| At3g62660        | CN-----                 | PSLVHVAITLDFEYLRGSAAVHSLKHSSCPESVFFHFL                  | 115                                  |                     |    |
| At1g24170        | -FVSSSS-----            | SSNDPSLVHIAMTLDSEYLRGSAAVHSLRHSASCPENVFFHFI             | 121                                  |                     |    |
| At1g70090        | -FVSS-----              | CDASLVHVAMTLDSEYLRGSAAVHSLRHSASCPENVFFHLI               | 118                                  |                     |    |
| At3g28340        | -LACD-----              | PSAVHIAMTLDPAYLRGTVAVHLSILKHTSCPENIFFHFI                | 107                                  |                     |    |
| At1g54940        | IAPSFAQ-FGQEAWRPKHEDN   | LASKAVTALPRRLRVAYVTVLHSSSEAYVCGAIALAQSIR                | 295                                  |                     |    |
| At1g08990        | IAP--                   | LG-QGEAWIQDKNRNLTSEKTTLSSFTAQRVAYVTVLHSSSEYVCGAIALAQSIR | 160                                  |                     |    |
| At4g33330        | LALP-----               | LWAPQGVDKVYDLTKIEAETKRPKREAYVTVLHSSSEYVCGAITLAQSL       | 325                                  |                     |    |
| At1g77130        | LSVP-----               | LQAKDNFYSAKAKKEAYATILHSAQFYVCGAIAAAQSIR                 | 309                                  |                     |    |
| At3g18660        | LSLP-----               | LGIQDRPSLGNPKREAYATILHSAHVYVCGAIAAAQSIR                 | 342                                  |                     |    |
| At1g56600        | -----                   | KLTVPVHSATGGEKRAYVTF                                    | LAGTGDYVKGVVGLAKGLR                  | 46                  |    |
| At1g09350        | -----                   | KLSY-----                                               | GEKKRAYVTF                           | LAGTGDYVKGVVGLAKGLR | 40 |
| At2g47180        | DAMS-----               | TVTITKPSLPSVQSDRAYVTF                                   | LAGNGDYVKGVVGLAKGLR                  | 54                  |    |
| At1g60450        | -----                   | MINASEKAPKE---                                          | RAYVTF                               | LAGNGDYVKGVVGLAKGLR | 44 |
| At1g60470        | -----                   | PMYLSEKAHQAPPRRAYVTF                                    | LAGNGDYVKGVVGLAKGLR                  | 47                  |    |
| At4g26250        | -----                   | IKADVTVSHDRVKRAYVTF                                     | LAGNKDYWMGVVGLAKGLR                  | 49                  |    |
| At5g23790        | -----                   | IEADVTVSHEGVERAYVTF                                     | LAGNKDYWMLVVGLAKGLR                  | 46                  |    |

|                  |                                                                |     |
|------------------|----------------------------------------------------------------|-----|
| <b>At3g61130</b> | TDKLNFGAMNMWFLLN--PPGKATIHVENVDEFKWLNSSYCPVLRQLESAAAMREYYFKA-  | 456 |
| At2g46480        | TDKLNFGAMSMWFLLN--PPGEATIHVQRFEDFTWLNSSYSPVLSQLESAAAMKKFYFKT-  | 333 |
| At4g38270        | TDKLNFGAMKMWFRIN--APADATIQVENINDFKWLNSSYCSVLRQLESARLKEYYFKA-   | 438 |
| At5g47780        | TDRLNYAAMRMWFLDN--PPGKATIQQVQVVEEFTWLNSSYSPVLKQLSSRSMIDYFFRA-  | 399 |
| At2g30575        | TDSLNYPAISMWFLLN--PSGRASIQILNIDEMNVLPLYHAELLMKQNSS-----        | 403 |
| At1g06780        | TDEQNYFAMKQWFIRN--PCKQSTVQVLNIEKLELDDSDMKLSLSAEFRVSFSPGDLLAS   | 418 |
| At2g38650        | TDRMNLGAMQVMFKLK-EYK-GAHVEVKAVEDYTFNLSSYVPVLKQLESANLQKIFYFE--  | 339 |
| At3g02350        | TDRMNLAAAMKVVFKMR-PLDRGAHVEIKSVEDFKFLNSSYAPVLRQLESAKLQKIFYFE-- | 341 |
| At2g20810        | TNEINYAAMKAWFAINMDNLRGVTVEVQKFEDFSWLNASYVPVLKQLQSDTQSYFFS--    | 321 |
| At1g18580        | TNRVSYKAMQAWFLS--NDFKGSAAIEIRSVVEEFSWLNASYSPVVKQLLDTDARAYYFG-- | 320 |
| At5g54690        | TDRKTYFPMQAWFSLH--PLSPAIEVKALHHFDWLSKGGKVPVLEAMEKDQVRVRSQFRGG  | 301 |
| At3g01040        | TDKPTYAGMHSWFALN--SVAPAIVEVKSVMHDFDWTRENVPVLEAVESHNSIRNYYHGN   | 277 |
| At5g15470        | TDKPTYAGMHSWFALN--SVAPAIVEVKGVHDFDWTRENVPVLEAVESHNGVRDYHGN     | 339 |
| At3g58790        | TDKPTYTPMHAWFAIN--SASSPVVEVKGLHQYDWPQEVNFKVREMLDIHRLIWRRHRYQN  | 305 |
| At1g19300        | ASASADASS--LRATIS----SSFPYLD-F'TVYVFNVSVSRLISS-----            | 140 |
| At3g50760        | TSK--QSHR--LQNYVV----ASFPYLK-FRIYPYDVAAISGLIST-----            | 126 |
| At1g13250        | ATHRRSAD---LRRIS----STFPYLT-YHIYHFDPNLVRSKISS-----             | 134 |
| At3g06260        | SLPHFEND---LFTSIK----STFPYLN-FKIYQFDPNLVRSKISK-----            | 140 |
| At1g02720        | VSESQN---LESLIR----STFPKLTNLKIYYFAPETVQSLISS-----              | 155 |
| At4g02130        | AVSEETNL---LESLVR----SVFPRLK-FNIYDFAPETVRGLISS-----            | 140 |
| At3g62660        | VS---ETD---LESLIR----STFPELK-LKVYVFDPEIVRTLIS-----             | 150 |
| At1g24170        | AAEFDSASPRVLSQLVR----STFPSLN-FKVYIFREDTVINLISS-----            | 162 |
| At1g70090        | AAEFDPASPRVLSQLVR----STFPSLN-FKVYIFREDTVINLISS-----            | 159 |
| At3g28340        | ASGTSQGS---LAKTLS----SVFPSLS-FKVYTFEETTVKNLISS-----            | 145 |
| At1g54940        | QSGSHKDMILLHDHTIT-----NKSILGLSAGWNLRLRIDIRISP-----             | 335 |
| At1g08990        | QSGSTKDMILLHDDSI-----NISLIGLSLAGWNLRRVERIRISP-----             | 200 |
| At4g33330        | QTNTKRDLILLHDDSI-----ITKLRALAAAGWKLRRIRIRNP-----               | 365 |
| At1g77130        | MSGSTRDLVILVDETI-----EYHKSGLVAAGWKIQMFQIRIRNP-----             | 349 |
| At3g18660        | QSGSTRDLVILVDDNIS-----GYHRSGLEAAGWQIRTIQIRIRNP-----            | 382 |
| At1g56600        | KAKSKYPLVVAVLPDVP-----EDHRKQLVDQGCVVKEIEPVYPP-----             | 86  |
| At1g09350        | KTKSKYPLVVAVLPDVP-----ADHRRQLLDQGCVIKEIQPVYPP-----             | 80  |
| At2g47180        | KVKSAAYPLVVAVLPDVP-----EEHRRILVDQGCIVREIEPVYPP-----            | 94  |
| At1g60450        | KVKSAAYPLVVAVLPDVP-----EEHREILRSQGCIVREIEPVHPP-----            | 84  |
| At1g60470        | KVKSAAYPLVVAVLPDVP-----EEHREILRSQGCVVREIEPVYPP-----            | 87  |
| At4g26250        | KVKSAAYPLVVAAILPDVP-----EEHRQILLAQGCIIREIEPVYPP-----           | 89  |
| At5g23790        | KVKSAAYPLVVAVLPDVP-----EEHRQILVDQGCIIIRDIEPVYPP-----           | 86  |

|                  |                                                                  |     |
|------------------|------------------------------------------------------------------|-----|
| <b>At3g61130</b> | -----DHP---TSGSSNLKYRNP KYLSMLNHLRFYLP EVYP-KLNKILFLDDDIIVQKD    | 506 |
| At2g46480        | -----ARSESVESGSENLKYRYPKYMSMLNHLRFYIPRIFP-KLEKILFVDDVVVQKD       | 386 |
| At4g38270        | -----NHPSSISAGADNLKYRNP KYLSMLNHLRFYLP EVYP-KLEKILFLDDDIIVQKD    | 491 |
| At5g47780        | -----HHTN----SDTNLKF RNP KYLSILNHLRFYLP EIFP-KLSKVLFLDDDIIVQKD   | 448 |
| At2g30575        | -----DPR IISALNHARFYLPDIFP-GLNKIVLFDHDDVVVQRD                    | 440 |
| At1g06780        | -----DPRFISTLNHARFYLPDIFP-GLNKMVLFDHDDVVVQRD                     | 419 |
| At2g38650        | -----QQNRTHYLSLFSQSHYLLPKLFD-KLEKVVILDDDDVVVQRD                  | 458 |
| At3g25140        | -----NKLENATKDTNMKFRNP KYLSILNHLRFYLP EYYP-KLHRILFLDDDDVVVQKD    | 392 |
| At3g02350        | -----NQAENATKDSHNLKFKNP KYLSMLNHLRFYLP EYYP-KLNKILFLDDDDVVVQKD   | 394 |
| At2g20810        | -----GHN-DDGRTP I--KFRNP KYLSMLNHLRFYIPEVFP-ALKKVVFLDDDDVVVQKD   | 371 |
| At1g18580        | -----EQTSQDTISEP--KVRNP KYLSLLNHLRFYIPEIYP-QLEKIVFLDDDDVVVQKD    | 371 |
| At5g54690        | SSVIVANNKENPVVAAKLQALSPKYNSLMNHIRIHLPELFP-SLNKVVFLDDDIVIQT       | 360 |
| At3g01040        | HIAGANLSETTPRTFASKLQSRSPKYISLLNHLRIYLP ELPFP-NLDKVVFLDDDIVIQKD   | 336 |
| At5g15470        | HVAGANL TETTPRTFASKLQSRSPKYISLLNHLRIYIPELFP-NLDKVVFLDDDIVVQGD    | 398 |
| At3g58790        | LKDSDFS FVEG--THEQSLQALNP SCLALLNHLRIYIPKLF P-DLNKIVLLDDDDVVVQSD | 362 |
| At1g19300        | -----SIRSALDCPLNYARSYLADLLPPCVR RVVYLDSDLILVDD                   | 180 |
| At3g50760        | -----SIRSALDSP LNYARNYLADILPTCLSRVVYLDSDLILVDD                   | 166 |
| At1g13250        | -----SIRRALDQPLNYARIYLADLLPIAVRRVIYFDSDLVVVDD                    | 174 |
| At3g06260        | -----SIRQALDQPLNYARIYLADIIPSSVDRIIYLDSDLVVVDD                    | 180 |
| At1g02720        | -----SVRQALEQPLNYARNYLADLLEPCVKRVIYLDSDLVVVDD                    | 195 |
| At4g02130        | -----SVRQALEQPLNYARSYLADLLEPCVNRVIYLDSDLVVVDD                    | 180 |
| At3g62660        | -----SVRQALEQPLNYARNYLADLLEPCVRRVIYLDSDLIVVDD                    | 190 |
| At1g24170        | -----SIRLALENPLNYARNYLGDILDRSVERVIYLDSDVITVDD                    | 202 |
| At1g70090        | -----SIRQALENPLNYARNYLGDILPCVDRVIYLDSDIIVVDD                     | 199 |
| At3g28340        | -----SIRQALDSP LNYARSYLSEILSSCVSRVIYLDSDVIVVDD                   | 185 |
| At1g54940        | -----FSQ---KDSYNEWNYSKLRVWQVTDYDKLVFIDADFII LKK                  | 373 |
| At1g08990        | -----FSK---KRSYNEWNYSKLRVWQVTDYDKLVFIDADFII VKN                  | 238 |
| At4g33330        | -----LAE---KDSYNEYNYSKFR LWQLTDYDKVIFIDADIIVLRN                  | 403 |
| At1g77130        | -----NAV---PNAYNEWNYSKFR LWQLTEYSKIIIFIDADMLILRN                 | 387 |
| At3g18660        | -----KAE---KDAYNEWNYSKFR LWQLTDYDKIIFIDADLLILRN                  | 420 |
| At1g56600        | -----ENQTEFAMAYYVINYSKLR IWKFVEYENKMIYLDGDIQVFDN                 | 127 |
| At1g09350        | -----DNQQTQFAMAYYVLNYSKLR IWKFVEYSKLIYLDGDIQVFN                  | 121 |
| At2g47180        | -----ENQQTQFAMAYYVINYSKLR IWKFVEYSKMIYLDGDIQVYEN                 | 135 |
| At1g60450        | -----DSQDAYARAYYIINYSKLR IWNFEEYENKMIYLDADIQVFGN                 | 125 |
| At1g60470        | -----DNQVEFAMAYYVLNYSKLR IWNFEEYSKMIYLDADIQVFDN                  | 128 |
| At4g26250        | -----ENKTGYSMAYYVINYSKLR IWKFVEYEEKMIYLDGDIQVFSN                 | 130 |
| At5g23790        | -----ENTTGYSMAYYVINYSKLR IWKFVEYEEKMIYLDGDIQVFKN                 | 127 |

:           ::: \* \* .

|                  |                                                                    |     |
|------------------|--------------------------------------------------------------------|-----|
| <b>At3g61130</b> | LTPLWEVNLNGKVN GAVETCGE-----SFHRFDKYL NFN SNP HIARNFNPN-----ACGWAY | 557 |
| At2g46480        | LTPLWSIDLK GKVN-----ENFDPK-----FCGWAY                              | 412 |
| At4g38270        | LAPLWEIDMQKVN GAVETCKE-----SFHRFDKYL NFN SNP KISENF DAG-----ACGWAF | 542 |
| At5g47780        | LSGLWSVDLKG NVGAVETCGE-----SFHRFDRYL NFN SNP LISKNF DPR-----ACGWAY | 499 |
| At2g30575        | LTRLWSLDMTGKV V GAVETCLEGD--PSYRSMDSF INFSDAWVSQK FDPK-----ACTWAF  | 494 |
| At1g06780        | LSRLWSIDMKGV V GAVETCLEGE--SSFRSMSTF INFSDTWVAGKFS PR-----ACTWAF   | 473 |
| At2g38650        | LSPLWDLDMEGKVN GAVK SCTVR-----LGQLRSLK RGNFDTN-----ACLWMS          | 502 |
| At3g25140        | LTGLWEIDMDGKVN GAVETCFG-----SFHRYAQYMF SHPLIKEKFNPK-----ACAWAY     | 443 |
| At3g02350        | VTGLWKINLDGKVN GAVETCFG-----SFHRYGQYLN FSHPLIKENFNPS-----ACAWAF    | 445 |
| At2g20810        | LSSLF SIDLNKNV GAVETCME-----TFHRYHKYLN YSHPLIRSHFDPD-----ACGWAF    | 422 |
| At1g18580        | LTPLFSLDLHG NVGAVETCLE-----AFHRYKYLN FSNPLISSK FDPQ-----ACGWAF     | 422 |
| At5g54690        | LSPLWDIDMNGKVN GAVETCRGEDK FVMSKKFKSYLN FSNPTIAKNFNPE-----ECAWAY   | 416 |
| At3g01040        | LSPLWDIDLNGKVN GAVETCRGEDVWVMSKRLRNYFNF SHPLIAKHL DPE-----ECAWAY   | 392 |
| At5g15470        | LTPLWDVDLGGKVN GAVETCRGEDEWVMSKRLRNYFNF SHPLIAKHL DPE-----ECAWAY   | 454 |
| At3g58790        | LSSLWETDLNGKVV GAVVDSWCGDNC CPGRKYDYFNF SHPLISSNLVQE-----DCAWLS    | 418 |
| At1g19300        | IAKLAATDLGRDSV LA APEYCNAN----FTSYFTSTFW SNPTLSLTFADR---KACYFNT    | 233 |
| At3g50760        | ISKLFSTHIP TDV VLA APEYCNAN----FTTYFTPTFW SNPSLITLSLNR RATPCYFNT   | 222 |
| At1g13250        | VAKLWRIDLR-RHV VGAPEYCHAN----FTNYFTSRFW SSQGYKSALKDR---KPCYFNT     | 226 |
| At3g06260        | IEKLWHVEME-GKVVA APEYCHAN----FTHYFTTRTFW SDPVLVKVLE GK---RPCYFNT   | 232 |
| At1g02720        | IVKLWKTGLG-QRT IGAPEYCHAN----FTKYFTGGFW SDKRFGN GTFKGR---NPCYFNT   | 247 |
| At4g02130        | IAKLWKTSLG-SRI IGAPEYCHAN----FTKYFTGGFW SEERFSGTFRGR---KPCYFNT     | 232 |
| At3g62660        | IAKLWMTKLG-SKT IGAPEYCHAN----FTKYFTPAFW SDERFSGAFSGR---KPCYFNT     | 242 |
| At1g24170        | ITKLWNTVLTGSRV IGAPEYCHAN----FTQYFTSGFW SDPALPGLISGQ---KPCYFNT     | 255 |
| At1g70090        | ITKLWNTSLTGSRI IGAPEYCHAN----FTKYFTSGFW SDPALPGFFSGR---KPCYFNT     | 252 |
| At3g28340        | IQKLWKI SLSGSR IGAPEYCHAN----FTKYFTSDFW SDKLSVDFSK---TPCYFNT       | 238 |
| At1g54940        | LDHLFYYPQLSASGNDK VLFNSGIMVLEPSACMF KDLMEKQKLESYNGG---DQG--FL      | 428 |
| At1g08990        | IDYLF SYPQLSAGN NKVLFNSGVMVLEPSACL FEDLMLKSF KIGSYNGG---DQG--FL    | 293 |
| At4g33330        | LDLLFHF PQMSATGN DVWLYNSGIMVIEPSNCTFTT IMSQRSEIVSYNGG---DQG--YL    | 458 |
| At1g77130        | IDFLF EFPEISATGN NATL FNSGLMVVEPSNSTF QLLMDNINEVVS YNGG---DQG--YL  | 442 |
| At3g18660        | IDFLF SMPEISATGN NGT L FNSGVMVIEPCNCTF QLLMEHINEIES YNGG---DQG--YL | 475 |
| At1g56600        | IDHLFDL P NQGFYAVMDC FCEKTWSHSPQYKIGYCQQCPDKV TWPEAKLG---PKPPLYF   | 184 |
| At1g09350        | IDHLFDL PDGNFYAVKDC FCEKTWSHTPQYKIGYCQQCPDKV TWPESELG---PKPPLYF    | 178 |
| At2g47180        | IDHLFDL PDG YLYAVMDC FCEKTWSHTPQYKIRYCQQCPDKV QWPKAELG---EPPALYF   | 192 |
| At1g60450        | IDDLFDMQDGYLHGVL SCFCEKIWSY TPLYSIGYCQYCPEKVVWPAEMES---APSPYF      | 182 |
| At1g60470        | IDHLFDLSDAYFYAVMDC FCEKTWSHSLQYSIGYCQQCPEKVTWPEDMES---PPPPLYF      | 185 |
| At4g26250        | IDHLFDTPRGYLYAVKDC FCEISWSKTPQFKIGYCQQCPEKVTWPVESLG---SPPPVYF      | 187 |
| At5g23790        | IDHLFDTPRGYLYAVKDC FEVSWSKTPQYKIGYCQQSPEKVTWPVESLG---APPPVYF       | 184 |

: \*

|                  |                                                                 |     |
|------------------|-----------------------------------------------------------------|-----|
| <b>At3g61130</b> | GMNMFDLKEWKKRDITGIYHKWQNMNENR--TLWKLGTLPPLGITFYGLTHPLNKAHWVL    | 615 |
| At2g46480        | GMNIFDLKEWKKNNITETIYHFQNLNENR--TLWKLGTLPPLGITFYNLTPQLQRKWHLL    | 470 |
| At4g38270        | GMNMFDLKEWRKRNITGIYHYWQDLNEDR--TLWKLGSPLPPGLITFYNLTYAMDRSWHVL   | 600 |
| At5g47780        | GMNVFDLDEWKRQNI TEVYHRWQDLNQDR--ELWKLGTLPPLGITFWRRRTYPLDRKWHIL  | 557 |
| At2g30575        | GMNLFDLLEWRRQELTSVYLKYFDLGVKG--HLWKAGGLPVGWLTFFGQTFPLEKRWNVG    | 552 |
| At1g06780        | GMNLIDLLEWRIRKLTSTYIKYFNLGTKR--PLWKAGSLP IQASLTFYRQTLALDKRWHVM  | 531 |
| At2g38650        | GLNVVDLARWRALGVSETYQKYKEMSSGD--ESSEAIALQWALLTFYRQDQVYALDDKWAALS | 561 |
| At3g25140        | GMNFFDLDAWRREKCTEYHYWQNLNENR--ALWKLGTLPPLGITFYSTTKPLDKSWHVL     | 501 |
| At3g02350        | GMNIFDLNAWRREKCTDQYHYWQNLNEDR--TLWKLGTLPPLGITFYSKTKSLDKSWHVL    | 503 |
| At2g20810        | GMNVFDLVEWRKRNVGTGIYHYWQEKNVDR--TLWKLGTLPPLGLLTFYGLTEALEASWHIL  | 480 |
| At1g18580        | GMNVFDLIAWRNANVTARYHYWQDQNRER--TLWKLGTLPPLGLLSFYGLTEPLDRRWHVL   | 480 |
| At5g54690        | GMNVFDLAAWRRNTNISSTYYHWLDENLKSDSLWLQGLTLPPLGLIAFHGHVQTIDPFWHML  | 476 |
| At3g01040        | GMNIFDLRTWRKTNIRETYHSWLKENLKSNLTMWKLGTLPPLALIAFKGHVQPIDSSWHML   | 452 |
| At5g15470        | GMNIFDLQAWRKTNIRETYHSWLRENLKSNLTMWKLGTLPPLALIAFKGHVHIIDSSWHML   | 514 |
| At3g58790        | GMNVFDLKAWRQTNITEAYSTWLRLSVRSGLQLWQPGALPPTLLAFKGLTQSLEPSWHVA    | 478 |
| At1g19300        | GVMVIDLSRWREGAYTSRIEEMAMQKR--MRIYELGSLPPFLLVFAGLIKPVNHRWNQH     | 291 |
| At3g50760        | GVMVIELKKWREGDYTRKIEIEMELQKR--IRIYELGSLPPFLLVFAGNIAPVDHRWNQH    | 280 |
| At1g13250        | GVMVIDLGKWRERRVTVKLETWMIQKR--HRIYELGSLPPFLLVFAGDVEPVEHRWNQH     | 284 |
| At3g06260        | GVMVDVNVKWRKGMYTQKVEEWMTIQKQ--KRIYHLGSLPPFLLIFAGDIKAVNHRWNQH    | 290 |
| At1g02720        | GVMVIDLKKWRQFRFTKRIEKWMEIQKI--ERIYELGSLPPFLLVFAGHVAPISHRWNQH    | 305 |
| At4g02130        | GVMVIDLKKWRRGGYTKRIEKWMEIQRR--ERIYELGSLPPFLLVFSGHVAPISHRWNQH    | 290 |
| At3g62660        | GVMVMDLERWRRVGYTEVIEKWMEIQKS--DRIYELGSLPPFLLVFAGEVAPIEHRWNQH    | 300 |
| At1g24170        | GVMVMDLVRWREGNYREKLEQWMQLQKK--MRIYDLGSLPPFLLVFAGNVEAIDHRWNQH    | 313 |
| At1g70090        | GVMVMDLVRWREGNYREKLETWMIQKK--KRIYDLGSLPPFLLVFAGNVEAIDHRWNQH     | 310 |
| At3g28340        | GVMVIDLERWREGDYTRKIENWMIQKED--KRIYELGSLPPFLLVFGGDIEAIDHQNQH     | 297 |
| At1g54940        | NEIFVWWHRLSKRVNTMKYFDE--KNHRRHD-----LPENVEGLHYLG-LKPWVCYRD      | 478 |
| At1g08990        | NEYFVWWHRLSKRLNTMKYFGDESRRHDKARN-----LPENLEGIHYLG-LKPWVCYRD     | 345 |
| At4g33330        | NEIFVWWHRLPRRVNFKNFWSNTTKERNIKNNLFA-AEPPQVYAVHYLG-WKPWLCYRD     | 516 |
| At1g77130        | NEIFTWHRIPKHMNFKLHFWEGDEPEIKMKTSFLGADPPILYVLHYLGYNKPWLCFRD      | 502 |
| At3g18660        | NEVFTWHRIPKHMNFKLHFWIGDEDDAKRKKTELFGAEPVLYVLHYLG-MKPWLCYRD      | 534 |
| At1g56600        | NAGMFVYEPNLSYHNLLLETVKIVPPTLFAEQDFLNMYFKDIYKPIPPVYNLVLAMLWRH    | 244 |
| At1g09350        | NAGMFVYEPSPITYYNLLETLKVVPPTPFAEQDFLNMYFKDIYKPIPPVYNLVLAMLWRH    | 238 |
| At2g47180        | NAGMFLYEPNLETYEDLLRTLKITPPTPFAEQDFLNMYFKKIYKPIPLVYNLVLAMLWRH    | 252 |
| At1g60450        | NAGMFVFEPNLTYESLLQTLQVTPPTPFAEQDFLNMFVFKVFKVSPVYNLILSVLWRH      | 242 |
| At1g60470        | NAGMFVFEPSPLTYESLLQTLKITPPSPFAEQDFLNMFVFEKVYKPIPLVYNLVLAMLWRH   | 245 |
| At4g26250        | NAGMLVFEPNLLTYEDLLRVVQITPTTYFAEQDFLNEYFTDIYKPIPSTYNLVMAMLWRH    | 247 |
| At5g23790        | NAGMLVFGPNLVITYEDLLRVVQITPTTYFAEQDFLNIYFRDIYKPIPSTYNLVMAMLWRH   | 244 |

|                  |                                                                        |     |
|------------------|------------------------------------------------------------------------|-----|
| <b>At3g61130</b> | <b>GLG</b> -YNPSIDKKDIEN--AAVVHYNGNMKPWLELAMSKYRPYWTKYIKFDHPYLRRCNLH   | 672 |
| At2g46480        | <b>GLG</b> -YDKGIDVKKIER--SAVIHYNGHMKPWTEMGISKYQPYWTKYTNFDHPYIFTCRLF   | 527 |
| At4g38270        | <b>GLG</b> -YDPALNQTAIEN--AAVVHYNGNYKPWLGFLAFAYKPYWSKYVEYDNPYLRRCDIN   | 657 |
| At5g47780        | <b>GLG</b> -YNPSVNQRDIER--AAVIHYNGNLKPWLEIGIPRYRGFWSKHVDYEHVYLRECNIN   | 614 |
| At2g30575        | <b>GLG</b> -HESGLRASDIEQ--AAVIHYDGMKPWLDIGIDKYKRYWNIHVPYHHPHLQRCNIH    | 609 |
| At1g06780        | <b>GLG</b> -RESGVKAVDIEQ--AAVIHYDGMKPWLDIGKENYKRYWNIHVPYHHTYLQCCNLQ    | 588 |
| At2g38650        | <b>GLG</b> -YDYINAQAIAKN--AAILHYNGNMKPWLELGI PNKYKRYWRRHLSREDRFLSDCNVN | 618 |
| At3g25140        | <b>GLG</b> -YNPSISMDEIRN--AAVVHFNGNMKPWLDIAMNQFRPLWTKHVYDYLEFVQACNFG   | 558 |
| At3g02350        | <b>GLG</b> -YNPGVSMDEIRN--AGVIHYNGNMKPWLDIAMNQYKSLWTKYVDNEMEFVQMCNFG   | 560 |
| At2g20810        | <b>GLG</b> -YTN-VDARVIEK--GAVLHFNGNLKPWLKIGIEKYKPLWERYVDYTSPFMQCCNFH   | 536 |
| At1g18580        | <b>GLG</b> -YDVNIDNRLIET--AAVIHYNGNMKPWLKLAIGRYKPFWLKFLNSSHPYLQDCVTA   | 537 |
| At5g54690        | <b>GLG</b> YQETTS-YADAES--AAVVHFNGRAKPWLDIAFPHLRPLWAKYLDSSDRFIK SCHIR  | 533 |
| At3g01040        | <b>GLG</b> YQSKTN-LENAKK--AAVIHYNGQSKPWLEIGFEHLRPFWTKYVNYSNDFIKNCHIL   | 509 |
| At5g15470        | <b>GLG</b> YQSKTN-IENVKK--AAVIHYNGQSKPWLEIGFEHLRPFWTKYVNYSNDFIKNCHIL   | 571 |
| At3g58790        | <b>GLG</b> SRSVKSPQEILKS--ASVLHFSGPAKPWLEISNPEVRSWYRYVNSSDIFVRKCKIM    | 536 |
| At1g19300        | <b>GLG</b> GDNFRGLCRDLHPGPVSLHWSGKGPWARLDAGRPCPLDALWAPYDLLQTPFALDS     | 351 |
| At3g50760        | <b>GLG</b> GDNFRGLCRDLHPGPVSLHWSGKGPVRLDDGRPCPLDALWVPYDLLESRFDLIE      | 340 |
| At1g13250        | <b>GLG</b> GDNLEGLCRNLHPGPVSLHWSGKGPWLRLDSRRPCPLDSLWAPYDLFRYSPLISD     | 344 |
| At3g06260        | <b>GLG</b> GDNFEGRCRTLHPGPI SLLHWSGKGPWLRLDSRKPCIVDHLWAPYDLYRSSRHSLE   | 350 |
| At1g02720        | <b>GLG</b> GDNVRGSCRDLHSGPVSLLHWSGSGKPWLRLDSKLPCLDTLWAPYDLYKXSH----    | 361 |
| At4g02130        | <b>GLG</b> GDNVRGSCRDLHHPGPVSLHWSGSGKPWLRLDSKRPCPLDALWTPYDLYRHSH----   | 346 |
| At3g62660        | <b>GLG</b> GDNVRGSCRDLHHPGPVSLHWSGSGKPWFRLDSRRPCPLDTLWAPYDLYGHYSR---   | 357 |
| At1g24170        | <b>GLG</b> GDNIRGSCRSLHPGPVSLHWSGKGPVRLDEKRPCPLDHLWEPYDLYKHKIERAK      | 373 |
| At1g70090        | <b>GLG</b> GDNVRGSCRSLHKGVPVSLHWSGKGPVRLDEKRPCPLDHLWEPYDLYEHKIERAK     | 370 |
| At3g28340        | <b>GLG</b> GDNI VSSCRSLHHPGPVSLI HWSGKGPVRLDDGKPCPIDYLWAPYDLHKSQRQYLQ  | 357 |
| At1g54940        | YDCNWDISERRVFASDSVHEKWWKVDKMSPEQLKGYCGLNLMKMEKNVEKWRKMAKLNFGP          | 538 |
| At1g08990        | YDCNWDLKTRRVYASESVHARWVKVYDKMPKLLKGYCGLNLMKMEKNVEKWRKMAKLNFGP          | 405 |
| At4g33330        | YDCNYDVDEQLVYASDAAHVRWVKVHDMSDDALQKFCRLTKKRRTINWERRKARLRGST            | 576 |
| At1g77130        | YDCNWNVDIFQEFASDEAHTWVRVHDAMPENLHKFCLLRSKQKAQLEWDRRQAEKGNYK            | 562 |
| At3g18660        | YDCNFNSDIFVEFATDIAHRKWWMVHDAMPQELHQFCYLRSKQKAQLEYDRRQAEAAANYA          | 594 |
| At1g56600        | PENIELDQVKVVHYCAAGAKPWRFTGEEENMDREDIKMLVKKWWDIYNDES LDYKNVVG           | 304 |
| At1g09350        | PENIELNEAKVVHYCAAGAKPWRFTGQEGNMEREDIKMLVKKWWDIYNDES LDYKNFNH           | 298 |
| At2g47180        | PENVELGKVKVVHYCAAGSKPWRYTGEANMEREDIKMLVKKWWDIYDDES LDYKPKPTV           | 312 |
| At1g60450        | PGKVDLESVKVVHYCPPGSKPWRYTGEENMDREDVKMLIKKWWDIYNDES LDFKPKSPA           | 302 |
| At1g60470        | PENVELEKVKVVHYCAAGSKPWRYTGEANMDREDIKMLVDKWWDVYNDES LDFKSKIPA           | 305 |
| At4g26250        | PEHIDLQISVIHYCANGSKPWRFDTEEHMDREDIKMLVKKWWDIYEDSS LDYKNFVET            | 307 |
| At5g23790        | PEHIDLQISVVHYCANGSKPWKFDEAEHMDREDIKMLVKKWWEIYEDSS LDYKNFVET            | 304 |

|                  |                                                                |     |
|------------------|----------------------------------------------------------------|-----|
| <b>At3g61130</b> | E-----                                                         | 673 |
| At2g46480        | E-----                                                         | 528 |
| At4g38270        | E-----                                                         | 658 |
| At5g47780        | P-----                                                         | 615 |
| At2g30575        | D-----                                                         | 610 |
| At1g06780        | A-----                                                         | 589 |
| At2g38650        | P-----                                                         | 619 |
| At3g25140        | L-----                                                         | 559 |
| At3g02350        | L-----                                                         | 561 |
| At2g20810        | -----                                                          |     |
| At1g18580        | -----                                                          |     |
| At5g54690        | AS-----                                                        | 535 |
| At3g01040        | E-----                                                         | 510 |
| At5g15470        | E-----                                                         | 572 |
| At3g58790        | N-----                                                         | 537 |
| At1g19300        | -----                                                          |     |
| At3g50760        | S-----                                                         | 341 |
| At1g13250        | S-----                                                         | 345 |
| At3g06260        | E-----                                                         | 351 |
| At1g02720        | -----                                                          |     |
| At4g02130        | -----                                                          |     |
| At3g62660        | -----                                                          |     |
| At1g24170        | DQSLLG FASLSELTDSSFL-----                                      | 393 |
| At1g70090        | DQSLFG FSSLSELTEDSSFF-----                                     | 390 |
| At3g28340        | YNQELEIL-----                                                  | 365 |
| At1g54940        | DRHWEIEVRDPRKTNLLVQ-----                                       | 557 |
| At1g08990        | ENHWKIRIKDPRKKNRLSQ-----                                       | 424 |
| At4g33330        | DYHWKINVTDP RRRRSYLIG-----                                     | 596 |
| At1g77130        | DGHWKIKIKDKRLKTCFEDFCFWESMLWHWGETNSTNNSSTTTTSSPPHK TALPSL----  | 618 |
| At3g18660        | DGHWKIRVKDPRFKICIDKLCNWKSM L RHWGESNWTDYESFVPTPPAITVDRRSSLPGHN | 654 |
| At1g56600        | ----DSHKKQQT LQQF IEALSEAGALQYVKAPSAA-----                     | 335 |
| At1g09350        | CGQKEDVHRKPKTLPQFFTDLSEADVLQCAKAPSAA-----                      | 334 |
| At2g47180        | V----DTEVDLVNLKPFITALTEAGRLNYVTAPSAA-----                      | 344 |
| At1g60450        | D-----LEATVLESTIIASVTEAPLSYSPAAPSAA-----                       | 332 |
| At1g60470        | D-----AEETVTKSSILASVLEPEMTYFPAPSAA-----                        | 334 |
| At4g26250        | ES-----KLSPINATLASKESVGDVLI SLAPSAA-----                       | 336 |
| At5g23790        | ES-----KLN PVTATLASKKLVGDVLTSLAPSAA-----                       | 333 |

|                  |   |     |
|------------------|---|-----|
| <b>At3g61130</b> | - |     |
| At2g46480        | - |     |
| At4g38270        | - |     |
| At5g47780        | - |     |
| At2g30575        | - |     |
| At1g06780        | - |     |
| At2g38650        | - |     |
| At3g25140        | - |     |
| At3g02350        | - |     |
| At2g20810        | - |     |
| At1g18580        | - |     |
| At5g54690        | - |     |
| At3g01040        | - |     |
| At5g15470        | - |     |
| At3g58790        | - |     |
| At1g19300        | - |     |
| At3g50760        | - |     |
| At1g13250        | - |     |
| At3g06260        | - |     |
| At1g02720        | - |     |
| At4g02130        | - |     |
| At3g62660        | - |     |
| At1g24170        | - |     |
| At1g70090        | - |     |
| At3g28340        | - |     |
| At1g54940        | - |     |
| At1g08990        | - |     |
| At4g33330        | - |     |
| At1g77130        | - |     |
| At3g18660        | L | 655 |
| At1g56600        | - |     |
| At1g09350        | - |     |
| At2g47180        | - |     |
| At1g60450        | - |     |
| At1g60470        | - |     |
| At4g26250        | - |     |
| At5g23790        | - |     |
